# Supplementary material for: Intrinsic Defects, Diffusion and Dopants in AVSi2O6 (A = Li and Na) Electrode Materials
Source: MDPI journal article supplement (doi:10.3390/batteries8030020), 2022-02-22
Supplement: s1 [file s1]

Supporting Information

# Intrinsic defects, diffusion and dopants in $\text{AVSi}_2\text{O}_6$ (A= Li and Na) electrode materials

Navaratnarajah Kuganathan<sup>1,2\*</sup>

<sup>1</sup> Department of Materials, Imperial College London, London, SW7 2AZ, United Kingdom; n.kuganathan@imperial.ac.uk

<sup>2</sup> Faculty of Engineering, Environment and Computing, Coventry University, Priory Street, Coventry CV1 5FB, United Kingdom; ad0636@coventry.ac.uk

\* Correspondence: n.kuganathan@imperial.ac.uk

**Table S1.** Two body Buckingham potentials used for dopant oxides in  $\text{LiVSi}_2\text{O}_6$  and  $\text{NaVSi}_2\text{O}_6$ .

| Interaction                      | A (eV)    | $\rho$ (Å) | C (eV·Å <sup>6</sup> ) | Y (e) | K (eV·Å <sup>-2</sup> ) |
|----------------------------------|-----------|------------|------------------------|-------|-------------------------|
| $\text{K}^+ - \text{O}^{2-}$     | 1000.300  | 0.36198    | 10.56900               | 1.000 | 99999                   |
| $\text{Rb}^+ - \text{O}^{2-}$    | 1010.80   | 0.3793     | 0.00                   | 1.000 | 99999                   |
| $\text{Al}^{3+} - \text{O}^{2-}$ | 1725.20   | 0.28971    | 0.000                  | 3.000 | 99999                   |
| $\text{Ga}^{3+} - \text{O}^{2-}$ | 1625.72   | 0.3019     | 0.000                  | 1.000 | 99999                   |
| $\text{Sc}^{3+} - \text{O}^{2-}$ | 1575.85   | 0.3211     | 0.000                  | 3.000 | 99999                   |
| $\text{In}^{3+} - \text{O}^{2-}$ | 1495.65   | 0.3327     | 4.33                   | 3.000 | 99999                   |
| $\text{Y}^{3+} - \text{O}^{2-}$  | 1766.40   | 0.33849    | 19.43                  | 3.000 | 99999                   |
| $\text{Gd}^{3+} - \text{O}^{2-}$ | 1885.75   | 0.3399     | 20.34                  | 3.000 | 99999                   |
| $\text{La}^{3+} - \text{O}^{2-}$ | 2088.79   | 0.3460     | 23.25                  | 3.000 | 99999                   |
| $\text{Ge}^{4+} - \text{O}^{2-}$ | 1497.3996 | 0.325646   | 16.00                  | 4.000 | 99999                   |
| $\text{Sn}^{4+} - \text{O}^{2-}$ | 1414.32   | 0.3479     | 13.66                  | 4.000 | 99999                   |
| $\text{Ti}^{4+} - \text{O}^{2-}$ | 5111.7    | 0.2625     | 0.00                   | −0.10 | 314.0                   |
| $\text{Zr}^{4+} - \text{O}^{2-}$ | 1502.11   | 0.3477     | 0.00                   | 1.35  | 169.617                 |
| $\text{Ce}^{4+} - \text{O}^{2-}$ | 1986.83   | 0.3511     | 20.40                  | 7.70  | 291.75                  |

**Citation:** Kuganathan, N. Intrinsic Defects, Diffusion and Dopants in  $\text{AVSi}_2\text{O}_6$  (A = Li and Na) Electrode Materials. *Batteries* **2022**, *8*, x. <https://doi.org/doi.org/10.3390/batteries8030020>

Academic Editors: Claudio Gerbaldi, Catia Arbizzani and Seung-Wan Song

Received: 30 September 2021

Accepted: 18 February 2022

Published: 22 February 2022

**Publisher's Note:** MDPI stays neutral with regard to jurisdictional claims in published maps and institutional affiliations.

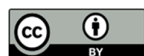

**Copyright:** © 2021 by the authors. Submitted for possible open access publication under the terms and conditions of the Creative Commons Attribution (CC BY) license (<https://creativecommons.org/licenses/by/4.0/>).
